# Supplementary material for: Developing a short-form version of the HIV Disability Questionnaire (SF-HDQ) for use in clinical practice: a Rasch analysis
Source: PubMed Central journal article supplement (PMC7789190; doi:10.1186/s12955-020-01643-2), 2021-01-06
Supplement: 12955_2020_1643_MOESM1_ESM.pdf [file 12955_2020_1643_MOESM1_ESM.pdf]

**Additional File 1 – Summary of Fit Statistics for the Initial to Final Model of the SF-HDQ Domains**

| Model                                                                                                                                                                                          | Description                                                                                    | Number of Items | Sample Size | Item Thresholds Ordered                       | X <sup>2</sup> Fit Statistic (degrees of freedom; p value)<br><i>Ideal not significant</i> | Cronbach's alpha<br><i>Ideal ≥0.70</i> | Person Separation Index (PSI)<br><i>Ideal ≥0.70</i> | Items with Fit Residuals (>+/-2.5) with significance after Bonferroni adjustment (0.05/# items in original domain)<br>Item (Fit residual) | Unidimensionality (Proportion of t-tests significant)<br><i>Ideal ≤5%</i> | Differential Item Functioning (DIF) |
|------------------------------------------------------------------------------------------------------------------------------------------------------------------------------------------------|------------------------------------------------------------------------------------------------|-----------------|-------------|-----------------------------------------------|--------------------------------------------------------------------------------------------|----------------------------------------|-----------------------------------------------------|-------------------------------------------------------------------------------------------------------------------------------------------|---------------------------------------------------------------------------|-------------------------------------|
| <b>PHYSICAL DOMAIN</b>                                                                                                                                                                         |                                                                                                |                 |             |                                               |                                                                                            |                                        |                                                     |                                                                                                                                           |                                                                           |                                     |
| Initial Model 1                                                                                                                                                                                | All 20 items in the original domain                                                            | 20 items        | 1010        | 3 items disordered<br>HDQ3,<br>HDQ8,<br>HDQ15 | 476 (df:180; p=0.00)                                                                       | 0.903                                  | 0.869                                               | Not assessed                                                                                                                              | Not assessed                                                              | Not assessed                        |
| Model 5                                                                                                                                                                                        | Rescored HDQ3 <sup>a</sup><br>HDQ8 <sup>a</sup><br>Deleted HDQ15 because rescoring nonsensical | 19 items        | 1010        | All items ordered                             | 511 (df:171; P<0.001)                                                                      | 0.899                                  | 0.867                                               | 4 items<br>HDQ9 (9.71)<br>HDQ12 (-3.32)<br>HDQ13 (-3.174)<br>HDQ8 (-2.64)<br>HDQ2 (3.68) <sup>c</sup>                                     | Not assessed                                                              | Not assessed                        |
| Model 10                                                                                                                                                                                       | Deleted HDQ9<br>HDQ2<br>HDQ12<br>HDQ8<br>HDQ13                                                 | 14 items        | 999         | All items ordered                             | 196 (df:126; P<0.001)                                                                      | 0.877                                  | 0.827                                               | None                                                                                                                                      | 3.1%                                                                      | No DIF                              |
| Added HDQ13 (muscle cramps) back into model because this item was not correlated highly with aches or pains (maybe distinct) but not similar enough to merge with HDQ14 I have stomach cramps. |                                                                                                |                 |             |                                               |                                                                                            |                                        |                                                     |                                                                                                                                           |                                                                           |                                     |
| Model 13                                                                                                                                                                                       | Deleted HDQ18<br>HDQ19<br>HDQ16                                                                | 12 items        | 982         | All items ordered                             | 179 (df: 108; p<0.001)                                                                     | 0.872                                  | 0.818                                               | HDQ17 (3.08) <sup>c</sup><br>(trouble sleeping) retained because item considered clinically important.                                    | 0.61%                                                                     | No DIF                              |
| Model 18<br>FINAL                                                                                                                                                                              | Deleted HDQ14<br>HDQ6<br>HDQ16                                                                 | 10 items        | 981         | All items ordered                             | 154 (df: 90; p<0.001)                                                                      | 0.848                                  | 0.790                                               | None                                                                                                                                      | 0.41%                                                                     | No DIF                              |

**Additional File 1 – Summary of Fit Statistics for the Initial to Final Model of the SF-HDQ Domains**

| Model                          | Description                                                                                                    | Number of Items | Sample Size | Item Thresholds Ordered | X <sup>2</sup> Fit Statistic (degrees of freedom; p value)<br><i>Ideal not significant</i> | Cronbach's alpha<br><i>Ideal ≥0.70</i> | Person Separation Index (PSI)<br><i>Ideal ≥0.70</i> | Items with Fit Residuals (>+/-2.5) with significance after Bonferroni adjustment (0.05/# items in original domain)<br>Item (Fit residual) | Unidimensionality (Proportion of t-tests significant)<br><i>Ideal ≤5%</i> | Differential Item Functioning (DIF) |
|--------------------------------|----------------------------------------------------------------------------------------------------------------|-----------------|-------------|-------------------------|--------------------------------------------------------------------------------------------|----------------------------------------|-----------------------------------------------------|-------------------------------------------------------------------------------------------------------------------------------------------|---------------------------------------------------------------------------|-------------------------------------|
| <b>COGNITIVE DOMAIN</b>        |                                                                                                                |                 |             |                         |                                                                                            |                                        |                                                     |                                                                                                                                           |                                                                           |                                     |
| Initial & Final                | No changes to 3 items in original domain                                                                       | 3 items         | 730         | All items ordered       | 76 (df: 21; p<0.001)                                                                       | 0.710                                  | 0.776                                               | HDQ21 (2.76) <sup>i</sup>                                                                                                                 | 1.23%                                                                     | No DIF                              |
| <b>MENTAL-EMOTIONAL DOMAIN</b> |                                                                                                                |                 |             |                         |                                                                                            |                                        |                                                     |                                                                                                                                           |                                                                           |                                     |
| Initial Model 1                | All 11 items in original domain                                                                                | 11 items        | 967         | All items ordered       | 360 (df: 99; p<0.001)                                                                      | 0.928                                  | 0.891                                               | HDQ28 (10.90)<br>HDQ33 (-5.07)<br>HDQ29 (-5.00)<br>HDQ30 (-3.81)<br>HDQ34 (3.07)                                                          | 3.93%                                                                     | HDQ34 (country)                     |
| Model 6                        | Deleted HDQ28<br>HDQ33<br>HDQ29<br>HDQ34<br>HDQ30                                                              | 6 items         | 918         | All items ordered       | 67 (df: 54; p=0.11) <sup>c</sup>                                                           | 0.868                                  | 0.810                                               | HDQ31 (3.02) <sup>c</sup>                                                                                                                 | 1.63%                                                                     | No DIF                              |
| Model 7 FINAL                  | Deleted HDQ31 (large residual although not statistically significant; but determined not clinically important) | 5 items         | 903         | All items ordered       | 54 (df: 45; p=0.17) <sup>d</sup>                                                           | 0.849                                  | 0.792                                               | None                                                                                                                                      | 1.14%                                                                     | No DIF                              |

**Additional File 1 – Summary of Fit Statistics for the Initial to Final Model of the SF-HDQ Domains**

| Model                     | Description                                                                                            | Number of Items | Sample Size | Item Thresholds Ordered                                         | X <sup>2</sup> Fit Statistic (degrees of freedom; p value)<br><i>Ideal not significant</i> | Cronbach's alpha<br><i>Ideal ≥0.70</i> | Person Separation Index (PSI)<br><i>Ideal ≥0.70</i> | Items with Fit Residuals (>+/-2.5) with significance after Bonferroni adjustment (0.05/# items in original domain)<br>Item (Fit residual) | Unidimensionality (Proportion of t-tests significant)<br><i>Ideal ≤5%</i> | Differential Item Functioning (DIF)                                                      |
|---------------------------|--------------------------------------------------------------------------------------------------------|-----------------|-------------|-----------------------------------------------------------------|--------------------------------------------------------------------------------------------|----------------------------------------|-----------------------------------------------------|-------------------------------------------------------------------------------------------------------------------------------------------|---------------------------------------------------------------------------|------------------------------------------------------------------------------------------|
| <b>UNCERTAINTY DOMAIN</b> |                                                                                                        |                 |             |                                                                 |                                                                                            |                                        |                                                     |                                                                                                                                           |                                                                           |                                                                                          |
| Initial Model 1           | All 14 original items in the model                                                                     | 14 items        | 995         | 5 items disordered<br>HDQ42<br>HDQ43<br>HDQ45<br>HDQ47<br>HDQ48 | 544 (df: 126; p<0.001)                                                                     | 0.918                                  | 0.899                                               | Not assessed                                                                                                                              | Not assessed                                                              | Not assessed                                                                             |
| Model 12                  | Rescored <sup>a</sup><br>HDQ43<br>HDQ45<br>Deleted<br>HDQ42<br>HDQ47<br>HDQ48 as rescoring nonsensical | 11 items        | 977         | All items ordered                                               | 381 (df: 99; p<0.001)                                                                      | 0.906                                  | 0.885                                               | HDQ46 (7.64)<br>HDQ44 (6.91)<br>HDQ37 (-5.53)<br>HDQ38 (-4.71)<br>HDQ35 (-4.61)<br>HDQ36 (-2.66)                                          | 9.72%                                                                     | Not assessed                                                                             |
| Model 15                  | Deleted<br>HDQ46<br>HDQ44<br>HDQ45<br>(largest residual)                                               | 8 items         | 947         | All items ordered                                               | 235 (df: 72; p<0.001)                                                                      | 0.896                                  | 0.871                                               | HDQ40 (5.21)<br>HDQ43 (4.56)<br>HDQ37 (-5.01)<br>HDQ38 (-3.56)<br>HDQ35 (-2.60)                                                           | 2.53%                                                                     | HDQ40 (country) (likely attributed to more Irish working compared with CAD participants) |
| Model 17                  | Deleted<br>HDQ40<br>HDQ37                                                                              | 6 items         | 931         | All items ordered                                               | 84 (df: 54; p=0.006)                                                                       | 0.860                                  | 0.817                                               | HDQ38 (-3.19)                                                                                                                             | 2.26%                                                                     | No DIF                                                                                   |
| Model 18                  | Deleted<br>HDQ38                                                                                       | 5 items         | 925         | All items ordered                                               | 75 (df: 45; p=0.003)                                                                       | 0.818                                  | 0.761                                               | None                                                                                                                                      | 1.62%                                                                     | No DIF                                                                                   |
| Model 19                  | Added<br>HDQ38 back into model<br>Deleted<br>HDQ43                                                     | 5 items         | 921         | All items ordered                                               | 58 (df: 45; p=0.09) <sup>d</sup>                                                           | 0.844                                  | 0.796                                               | None                                                                                                                                      | 2.17%                                                                     | No DIF                                                                                   |

**Additional File 1 – Summary of Fit Statistics for the Initial to Final Model of the SF-HDQ Domains**

| Model                                                                                               | Description                                                                                      | Number of Items | Sample Size | Item Thresholds Ordered | X <sup>2</sup> Fit Statistic (degrees of freedom; p value)<br><i>Ideal not significant</i> | Cronbach's alpha<br><i>Ideal ≥0.70</i> | Person Separation Index (PSI)<br><i>Ideal ≥0.70</i> | Items with Fit Residuals (>+/-2.5) with significance after Bonferroni adjustment (0.05/# items in original domain)<br>Item (Fit residual) | Unidimensionality (Proportion of t-tests significant)<br><i>Ideal ≤5%</i> | Differential Item Functioning (DIF)                                                                                                                            |
|-----------------------------------------------------------------------------------------------------|--------------------------------------------------------------------------------------------------|-----------------|-------------|-------------------------|--------------------------------------------------------------------------------------------|----------------------------------------|-----------------------------------------------------|-------------------------------------------------------------------------------------------------------------------------------------------|---------------------------------------------------------------------------|----------------------------------------------------------------------------------------------------------------------------------------------------------------|
| We went back to Model 15 (8 items) to explore an alternate 5 item combination for better model fit. |                                                                                                  |                 |             |                         |                                                                                            |                                        |                                                     |                                                                                                                                           |                                                                           |                                                                                                                                                                |
| Model 23                                                                                            | Deleted HDQ37<br>HDQ43 not considered as clinically relevant in current state of combination ART | 6 items         | 936         | All items ordered       | 97 (df: 54; p<0.001)                                                                       | 0.860                                  | 0.825                                               | None                                                                                                                                      | 0.85%                                                                     | HDQ40 (country)<br>Significant DIF but not >1.0 logit difference (likely attributed to more Irish working compared with CAD participants).                     |
| Model 24 FINAL                                                                                      | Deleted HDQ38                                                                                    | 5 items         | 930         | All items ordered       | 59 (df: 45; p=0.10) <sup>d</sup>                                                           | 0.823                                  | 0.780                                               | None                                                                                                                                      | 1.72%                                                                     | HDQ40 (country)<br><br>>1.0 logit difference and item considered clinically important (likely attributed to more Irish working compared with CAD participants) |
| <b>DIFFICULTIES WITH DAY-TO-DAY ACTIVITIES DOMAIN</b>                                               |                                                                                                  |                 |             |                         |                                                                                            |                                        |                                                     |                                                                                                                                           |                                                                           |                                                                                                                                                                |
| Initial Model 1                                                                                     | All 9 original items in the model                                                                | 9 items         | 753         | All items ordered       | 295 (df: 81; p<0.001)                                                                      | 0.881                                  | 0.796                                               | HDQ56 (8.02) <sup>e</sup><br>HDQ52 (-4.79)<br>HDQ55 (-4.50)<br>HDQ53 (-3.44) <sup>c</sup>                                                 | 3.85%                                                                     | Not assessed                                                                                                                                                   |
| Model 3                                                                                             | Deleted HDQ56 <sup>e</sup><br>HDQ52                                                              | 7 items         | 701         | All items ordered       | 81 (df: 63; p=0.06) <sup>c</sup>                                                           | 0.857                                  | 0.775                                               | None                                                                                                                                      | 5.28%                                                                     | No DIF                                                                                                                                                         |
| Model 4                                                                                             | Deleted HDQ51                                                                                    | 6 items         | 679         | All items ordered       | 105 (df: 54; p<0.001)                                                                      | 0.833                                  | 0.735                                               | None                                                                                                                                      | 5.15%                                                                     | No DIF                                                                                                                                                         |
| Model 9 - FINAL                                                                                     | Deleted HDQ57 <sup>f</sup>                                                                       | 5 items         | 675         | All items ordered       | 77 (df: 45; p=0.002)                                                                       | 0.795                                  | 0.690                                               | None                                                                                                                                      | 0.74%                                                                     | No DIF                                                                                                                                                         |

**Additional File 1 – Summary of Fit Statistics for the Initial to Final Model of the SF-HDQ Domains**

| Model                | Description                                       | Number of Items | Sample Size | Item Thresholds Ordered              | X <sup>2</sup> Fit Statistic (degrees of freedom; p value)<br><i>Ideal not significant</i> | Cronbach's alpha<br><i>Ideal ≥0.70</i> | Person Separation Index (PSI)<br><i>Ideal ≥0.70</i> | Items with Fit Residuals (>+/-2.5) with significance after Bonferroni adjustment (0.05/# items in original domain)<br>Item (Fit residual) | Unidimensionality (Proportion of t-tests significant)<br><i>Ideal ≤5%</i> | Differential Item Functioning (DIF)                                                          |
|----------------------|---------------------------------------------------|-----------------|-------------|--------------------------------------|--------------------------------------------------------------------------------------------|----------------------------------------|-----------------------------------------------------|-------------------------------------------------------------------------------------------------------------------------------------------|---------------------------------------------------------------------------|----------------------------------------------------------------------------------------------|
| <b>SOCIAL DOMAIN</b> |                                                   |                 |             |                                      |                                                                                            |                                        |                                                     |                                                                                                                                           |                                                                           |                                                                                              |
| Initial Model 1      | All 12 items in the model                         | 12 items        | 966         | 2 items disordered<br>HDQ63<br>HDQ67 | 337 (df: 108; p<0.001)                                                                     | 0.903                                  | 0.862                                               | HDQ67 (6.22)<br>HDQ68 (-5.18)<br>HDQ66 (-5.07)<br>HDQ64 (4.96)<br>HDQ59 (-3.77)                                                           | Not assessed                                                              | Not assessed                                                                                 |
| Model 4              | Rescored HDQ63 <sup>b</sup><br>HDQ67 <sup>b</sup> | 12 items        | 966         | All items ordered                    | 306 (df: 108; p<0.001)                                                                     | 0.898                                  | 0.862                                               | HDQ64 (6.06)<br>HDQ68 (-4.17)<br>HDQ66 (-4.32)<br>HDQ59 (-3.92)                                                                           | Not assessed                                                              | Not assessed                                                                                 |
| Model 7              | Deleted HDQ64<br>HDQ59<br>HDQ66                   | 9 items         | 986         | All items ordered                    | 182.24 (df: 81; p<0.001)                                                                   | 0.856                                  | 0.806                                               | HDQ60 (-2.70)<br>HDQ68 (-2.59)                                                                                                            | 4.18%                                                                     | HDQ65 (country)<br>HDQ67 (country)                                                           |
| Model 16 - FINAL     | Deleted HDQ60<br>HDQ61                            | 7 items         | 943         | All items ordered                    | 87 (df: 63; p=0.03)                                                                        | 0.794                                  | 0.745                                               | HDQ68 (-3.14) <sup>g</sup>                                                                                                                | 1.27%                                                                     | HDQ63 (country) <sup>h</sup><br>HDQ65 (country) <sup>h</sup><br>HDQ69 (country) <sup>h</sup> |

**Notes:** Sample size varied as we omitted extreme values from model analyses.

<sup>a</sup> Items rescored to 4 categories;

<sup>b</sup> Items rescored to 3 categories;

<sup>c</sup> Item has absolute F value fit residual >2.5, but not significant with Bonferroni adjustment for that domain. Items listed in order of descending absolute F value

<sup>d</sup> Model fit X<sup>2</sup> test - p value not significant (indication of model fit) – achieved for mental-emotional and uncertainty domains;

<sup>e</sup> HDQ56 (trouble keeping track of finances) – deleted this item; item severity may be due to item interpreted as financial insecurity rather than ability to keep track of finances as daily activity as intended by the item;

<sup>f</sup> HDQ57 (trouble getting around, such as driving or taking public transportation) - Deleted because large DIF in graph analysis for country and this item could be considered captured with HDQ55 (trouble getting out to do errands) because one may need to get around in order to conduct errands;

<sup>g</sup> HDQ68 (tend to isolate self from others) retained because subsequent model with this item deleted demonstrated worse fit (lower PSI);

<sup>h</sup> DIF for country (HDQ63: housing; HDQ65: find it hard to ask others for help; HDQ69: find it hard to take part in leisure or recreational activities). Items retained given clinical importance and expected cultural differences between samples of Canadian and Irish participants;

<sup>i</sup> HDQ21 – Significant Residual >2.5: retained this item because the cognitive domain has a minimum of 3 items.
