# Supplementary material for: Developing a short-form version of the HIV Disability Questionnaire (SF-HDQ) for use in clinical practice: a Rasch analysis
Source: PubMed Central journal article supplement (PMC7789190; doi:10.1186/s12955-020-01643-2), 2021-01-06
Supplement: 12955_2020_1643_MOESM3_ESM.pdf [file 12955_2020_1643_MOESM3_ESM.pdf]

**Additional File 3 – Original HDQ Items (n=69) and Final SF-HDQ Items (n=35)**

| Physical Domain                           |                               |                                                           |
|-------------------------------------------|-------------------------------|-----------------------------------------------------------|
| Item #                                    | Original HDQ Items            | Final SF-HDQ Items                                        |
| 1                                         | Fatigue                       | Fatigue                                                   |
| 2                                         | Diarrhea                      | --                                                        |
| 3                                         | Nausea                        | Nausea ( <i>Rescored to 4 response categories (0-3)</i> ) |
| 4                                         | Headaches                     | Headaches                                                 |
| 5                                         | Numbness or tingling in hands | Numbness or tingling in hands <i>or feet</i>              |
| 6                                         | Numbness or tingling in feet  | --                                                        |
| 7                                         | Aches or pains.               | Aches or pains                                            |
| 8                                         | Trouble swallowing food       | --                                                        |
| 9                                         | Decreased libido              | --                                                        |
| 10                                        | Shortness of breath           | Shortness of breath                                       |
| 11                                        | Fever, chills, or sweats      | Fever, chills, or sweats                                  |
| 12                                        | Muscle weakness               | --                                                        |
| 13                                        | Muscle cramps                 | Muscle cramps                                             |
| 14                                        | Stomach cramps                | --                                                        |
| 15                                        | Losing weight                 | --                                                        |
| 16                                        | Lack an appetite for food.    | --                                                        |
| 17                                        | Trouble sleeping              | Trouble sleeping                                          |
| 18                                        | Vision problems               | --                                                        |
| 19                                        | Hearing problems              | --                                                        |
| 20                                        | Feel dizzy                    | Feel dizzy                                                |
| <b>Physical Total<br/>Number of Items</b> | <b>20 items</b>               | <b>10 items</b>                                           |

**Notes:** In future refinement of the SF-HDQ, we will merge HDQ5 and HDQ6 to one item: “I have numbness or tingling in hands or feet” given similar neuropathic source; retained HDQ5 over HDQ6 in the model due to better fit (see Additional File 1); HDQ13 (muscle cramps) and HDQ14 (stomach cramps) clinically distinct, hence items not merged. Retained muscle cramps because item not highly correlated with aches or pains (suggesting it is distinct) (see Additional file 1).

| Cognitive Domain                           |                                                                   |                                                                   |
|--------------------------------------------|-------------------------------------------------------------------|-------------------------------------------------------------------|
| Item #                                     | Original HDQ Items                                                | Final SF-HDQ Items                                                |
| 21                                         | Trouble remembering like appointments and when to take medication | Trouble remembering like appointments and when to take medication |
| 22                                         | Trouble thinking clearly                                          | Trouble thinking clearly                                          |
| 23                                         | Trouble concentrating                                             | Trouble concentrating                                             |
| <b>Cognitive Total<br/>Number of Items</b> | <b>3 items</b>                                                    | <b>3 items</b>                                                    |

| Mental-Emotional Domain                 |                                       |                               |
|-----------------------------------------|---------------------------------------|-------------------------------|
| Item #                                  | Original HDQ Items                    | Final SF-HDQ Items            |
| 24                                      | Feel anxious                          | Feel anxious                  |
| 25                                      | Feel sad, down, or depressed          | Feel sad, down, or depressed  |
| 26                                      | Afraid for my future                  | Afraid for my future          |
| 27                                      | Lack confidence around others         | Lack confidence around others |
| 28                                      | Uncomfortable with how my body looks  | --                            |
| 29                                      | Feel isolated                         | --                            |
| 30                                      | Feel embarrassed around others        | --                            |
| 31                                      | Feel guilty                           | --                            |
| 32                                      | Feel lonely                           | Feel lonely                   |
| 33                                      | Discouraged about future life options | --                            |
| 34                                      | Feel 'shut out' by friends or family  | --                            |
| <b>Mental Total<br/>Number of Items</b> | <b>11 items</b>                       | <b>5 items</b>                |

Additional File 3 – Overview of Original HDQ Items and Final SF-HDQ Items

| Item #                                                                                                                           | Original HDQ Items                                                                                                                                        | Final SF-HDQ Items                                                             |
|----------------------------------------------------------------------------------------------------------------------------------|-----------------------------------------------------------------------------------------------------------------------------------------------------------|--------------------------------------------------------------------------------|
| <b>Uncertainty Domain</b>                                                                                                        |                                                                                                                                                           |                                                                                |
| 35                                                                                                                               | Worry about future health living with HIV                                                                                                                 | Worry about future health living with HIV                                      |
| 36                                                                                                                               | Worry about lab test results such as my CD4 count and viral load                                                                                          | Worry about lab test results such as my CD4 count and viral load               |
| 37                                                                                                                               | Worry about having a serious illness                                                                                                                      | --                                                                             |
| 38                                                                                                                               | Worry about what the outcome of next episode of illness might be                                                                                          | --                                                                             |
| 39                                                                                                                               | Worry about the side effects of HIV treatments                                                                                                            | Worry about the side effects of HIV treatments                                 |
| 40                                                                                                                               | Worry about income or financial security living with HIV                                                                                                  | Worry about income or financial security living with HIV                       |
| 41                                                                                                                               | Worry what might happen to my family and friends if have an episode of illness                                                                            | Worry what might happen to my family and friends if have an episode of illness |
| 42                                                                                                                               | Worry about being able to remain in the workforce or return to the workforce. (0=not at all or not applicable)                                            | --                                                                             |
| 43                                                                                                                               | Worry about dying                                                                                                                                         | --                                                                             |
| 44                                                                                                                               | Worry about my bodily appearance                                                                                                                          | --                                                                             |
| 45                                                                                                                               | Worry about the legal issues of telling others about my HIV status                                                                                        | --                                                                             |
| 46                                                                                                                               | Worry about what others would think of me if they knew I was HIV positive                                                                                 | --                                                                             |
| 47                                                                                                                               | Worry about transmitting HIV to others                                                                                                                    | --                                                                             |
| 48                                                                                                                               | Put certain life decisions on hold (such as buying a house, returning to work or school, or starting a family) because of my uncertainty living with HIV. | --                                                                             |
| <b>Uncertainty Total Number of Items</b>                                                                                         | <b>14 items</b>                                                                                                                                           | <b>5 items</b>                                                                 |
| <b>Notes:</b> HDQ43 – removed as this item considered to be captured by HDQ35 worry about future health (see Additional file 1). |                                                                                                                                                           |                                                                                |

| <b>Day-to-Day Activities Domain</b>                                                                                                                                            |                                                                                                |                                                                                                |
|--------------------------------------------------------------------------------------------------------------------------------------------------------------------------------|------------------------------------------------------------------------------------------------|------------------------------------------------------------------------------------------------|
| Item #                                                                                                                                                                         | Original HDQ Items                                                                             | Final SF-HDQ Items                                                                             |
| 49                                                                                                                                                                             | Unsteady on my feet                                                                            | Unsteady on my feet                                                                            |
| 50                                                                                                                                                                             | Trouble walking                                                                                | Trouble walking                                                                                |
| 51                                                                                                                                                                             | Trouble climbing stair                                                                         | --                                                                                             |
| 52                                                                                                                                                                             | Trouble with daily activities such as eating, bathing, grooming, or dressing                   | --                                                                                             |
| 53                                                                                                                                                                             | Trouble doing household chores such as cleaning, doing dishes, laundry, and cooking            | Trouble doing household chores such as cleaning, doing dishes, laundry, and cooking            |
| 54                                                                                                                                                                             | Trouble taking part in leisure or recreation, such as exercise or dancing                      | Trouble taking part in leisure or recreation, such as exercise or dancing                      |
| 55                                                                                                                                                                             | Trouble getting out to do errands, such as grocery shopping, banking, or doctor's appointments | Trouble getting out to do errands, such as grocery shopping, banking, or doctor's appointments |
| 56                                                                                                                                                                             | Trouble keeping track of my finances                                                           | --                                                                                             |
| 57                                                                                                                                                                             | Trouble getting around, such as driving or taking public transportation                        | --                                                                                             |
| <b>Day Total Number of Items</b>                                                                                                                                               | <b>9 items</b>                                                                                 | <b>5 items</b>                                                                                 |
| <b>Notes:</b> HDQ57 - Deleted because DIF in graph analysis for country and this could be considered part of HDQ55 (trouble getting out to do errands (see Additional File 1). |                                                                                                |                                                                                                |

Additional File 3 – Overview of Original HDQ Items and Final SF-HDQ Items

| <b>Social Domain</b>                                                                                                                                                                                                                           |                                                                                                           |                                                                                                                                                               |
|------------------------------------------------------------------------------------------------------------------------------------------------------------------------------------------------------------------------------------------------|-----------------------------------------------------------------------------------------------------------|---------------------------------------------------------------------------------------------------------------------------------------------------------------|
| <b>Item #</b>                                                                                                                                                                                                                                  | <b>Original HDQ Items</b>                                                                                 | <b>Final SF-HDQ Items</b>                                                                                                                                     |
| 58                                                                                                                                                                                                                                             | Find hard to meet the needs of those I care for                                                           | Find hard to meet the needs of those I care for                                                                                                               |
| 59                                                                                                                                                                                                                                             | Find it hard to fulfill role as a family or community member living with HIV                              | --                                                                                                                                                            |
| 60                                                                                                                                                                                                                                             | Feel cut off from friends, networks, ethnic or religious communities                                      | --                                                                                                                                                            |
| 61                                                                                                                                                                                                                                             | Illness prevents from doing volunteer or paid work or going to school                                     | --                                                                                                                                                            |
| 62                                                                                                                                                                                                                                             | Feel work performance limited (0=not at all or not applicable)                                            | Feel work performance limited (0=not at all or not applicable)                                                                                                |
| 63                                                                                                                                                                                                                                             | Struggle to maintain safe and stable housing                                                              | Struggle to maintain safe and stable housing<br><i>(Rescored to 3 response categories (0-2))</i>                                                              |
| 64                                                                                                                                                                                                                                             | Find it hard to talk with others about illness, even family and friends                                   | --                                                                                                                                                            |
| 65                                                                                                                                                                                                                                             | Find it hard to ask others for help when go through an episode of illness                                 | Find it hard to ask others for help when go through an episode of illness                                                                                     |
| 66                                                                                                                                                                                                                                             | Find it hard to start new friendships living with HIV                                                     | --                                                                                                                                                            |
| 67                                                                                                                                                                                                                                             | Find it hard to start new intimate, sexual relationships living with HIV (0=not at all or not applicable) | Find it hard to start new intimate, sexual relationships living with HIV (0=not at all or not applicable)<br><i>(Rescored to 3 response categories (0-2))</i> |
| 68                                                                                                                                                                                                                                             | Tend to isolate myself from others because I am HIV positive                                              | Tend to isolate myself from others because I am HIV positive                                                                                                  |
| 69                                                                                                                                                                                                                                             | Find it hard to take part in leisure or recreational things because can't afford it                       | Find it hard to take part in leisure or recreational things because can't afford it                                                                           |
| <b>Social Total Number of Items</b>                                                                                                                                                                                                            | <b>12 items</b>                                                                                           | <b>7 items</b>                                                                                                                                                |
| <b>Notes:</b> <u>Rescoring:</u> Rescored to 3 response categories (0-2) - HDQ63 and HDQ67 to achieve ordered thresholds; HDQ61: Deleted HDQ61 because captured in HDQ62 – which describes limitations rather than prevention (all or nothing). |                                                                                                           |                                                                                                                                                               |
