# Supplementary material for: Developing a short-form version of the HIV Disability Questionnaire (SF-HDQ) for use in clinical practice: a Rasch analysis
Source: PubMed Central journal article supplement (PMC7789190; doi:10.1186/s12955-020-01643-2), 2021-01-06
Supplement: 12955_2020_1643_MOESM4_ESM.pdf [file 12955_2020_1643_MOESM4_ESM.pdf]

#### **Additional File 4: Scoring Algorithms for SF-HDQ Domains**

(*Total* = Raw Domain Sum Score)

##### **Physical Domain (10 items)**

$$\text{Scaled Score} = 51.21609 + 13.93883 (-3.674347 + 0.435572 \times Total + -0.018692 \times Total^2 + 0.000314 \times Total^3)$$

##### **Cognitive Domain (3 items)**

$$\text{Scaled Score} = 48.34017 + 9.369442 (-5.159343 + 1.283297 \times Total + -0.112806 \times Total^2 + 0.006665 \times Total^3)$$

##### **Mental-Emotional Domain (5 items)**

$$\text{Scaled Score} = 52.04952 + 13.33447 (-3.903382 + 0.803233 \times Total + -0.059565 \times Total^2 + 0.001908 \times Total^3)$$

##### **Uncertainty Domain (5 items)**

$$\text{Scaled Score} = 49.72724 + 14.0912 (-3.528956 + 0.723459 \times Total + -0.055904 \times Total^2 + 0.001874 \times Total^3)$$

##### **Day-to-Day Activities Domain (5 items)**

$$\text{Scaled Score} = 44.84344 + 11.43029 (-3.92321 + 0.803392 \times Total + -0.068271 \times Total^2 + 0.002499 \times Total^3)$$

##### **Social Domain (7 items)**

$$\text{Scaled Score} = 47.1352 + 14.26797 (-3.303567 + 0.627115 \times Total + -0.046006 \times Total^2 + 0.001335 \times Total^3)$$
